# Supplementary material for: RNase Y Autoregulates Its Synthesis in Bacillus subtilis
Source: MDPI journal article supplement (doi:10.3390/microorganisms11061374), 2023-05-24

## Supplementary data

### Uncropped Western blots of Figure 1 C and D

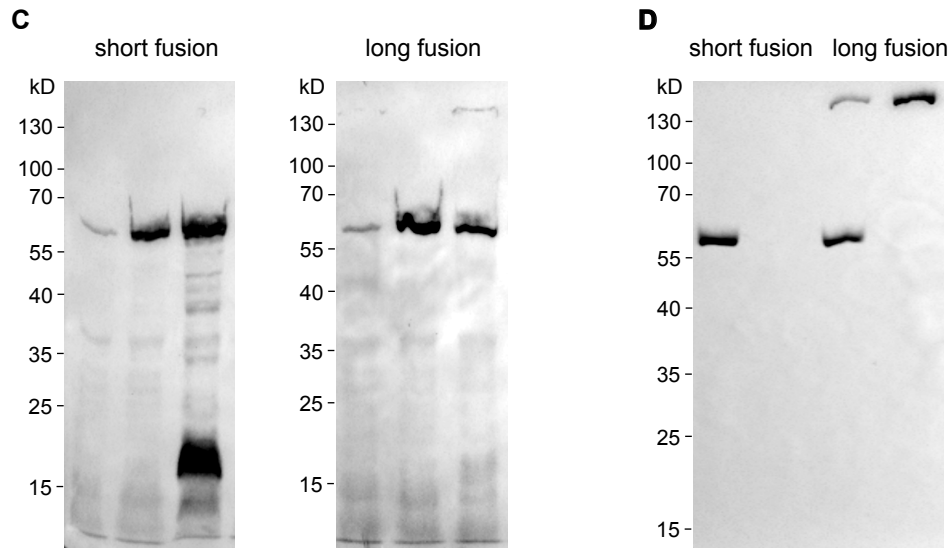

### Uncropped Northern blots of Figure 2 A, B and C

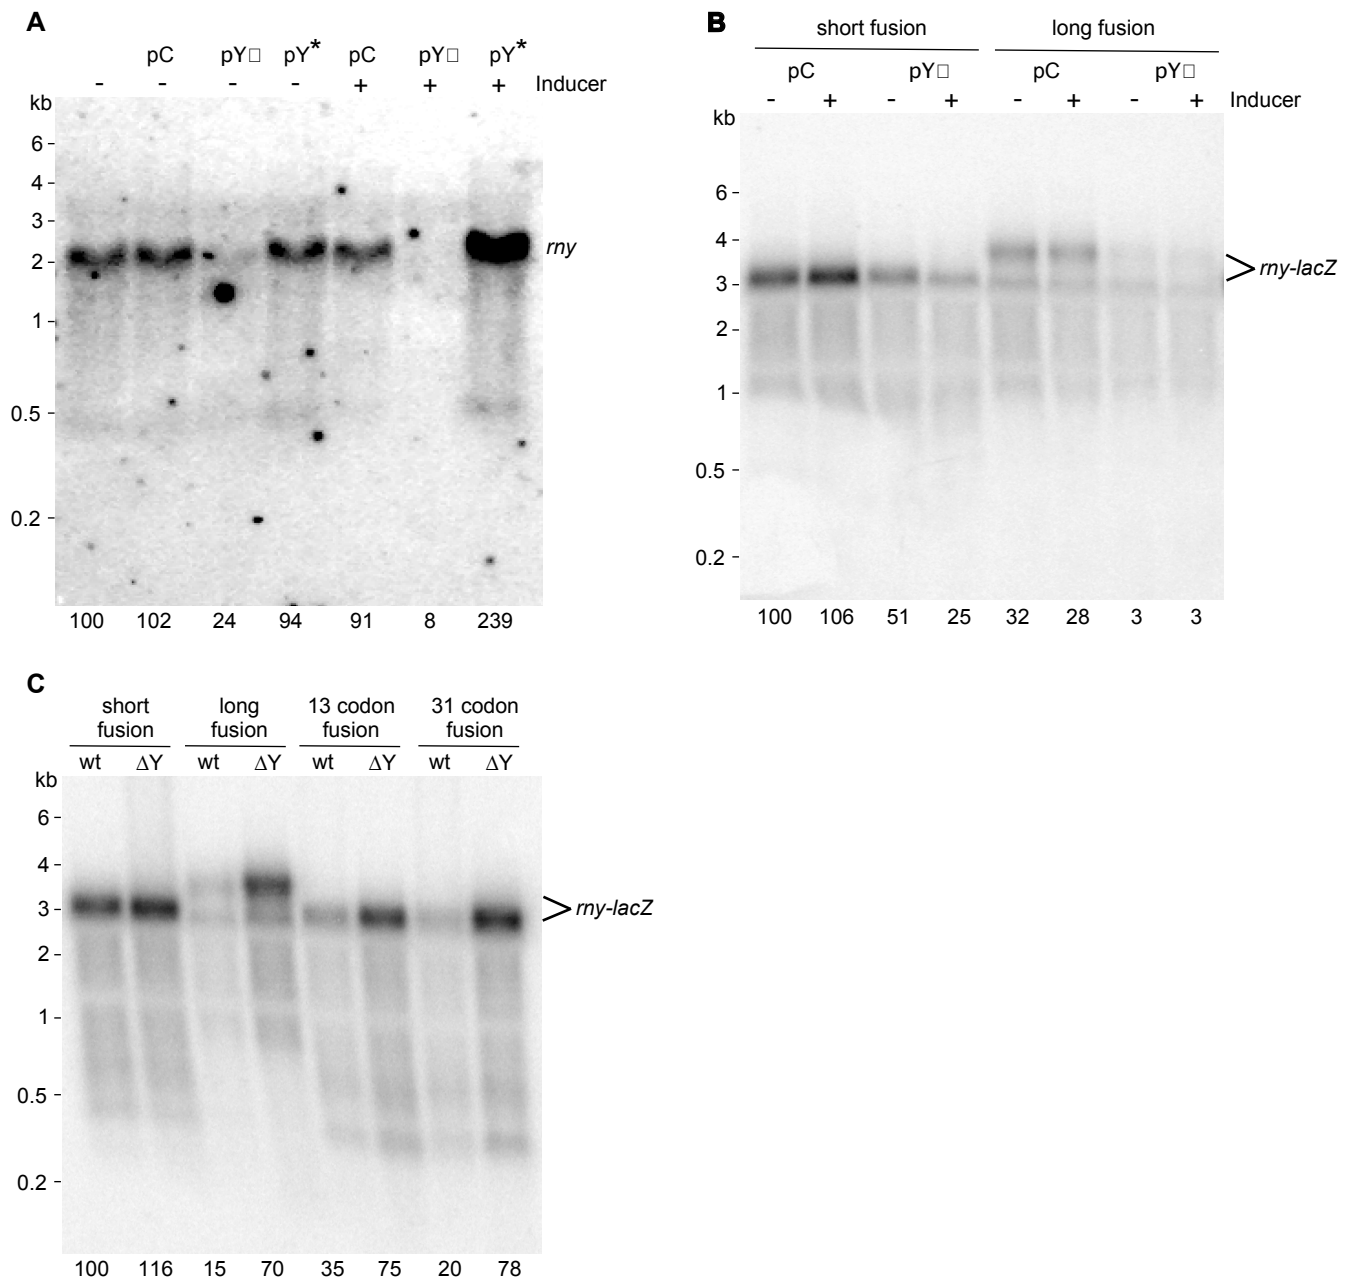

Uncropped Northern blots of Figure 3 A, B and C

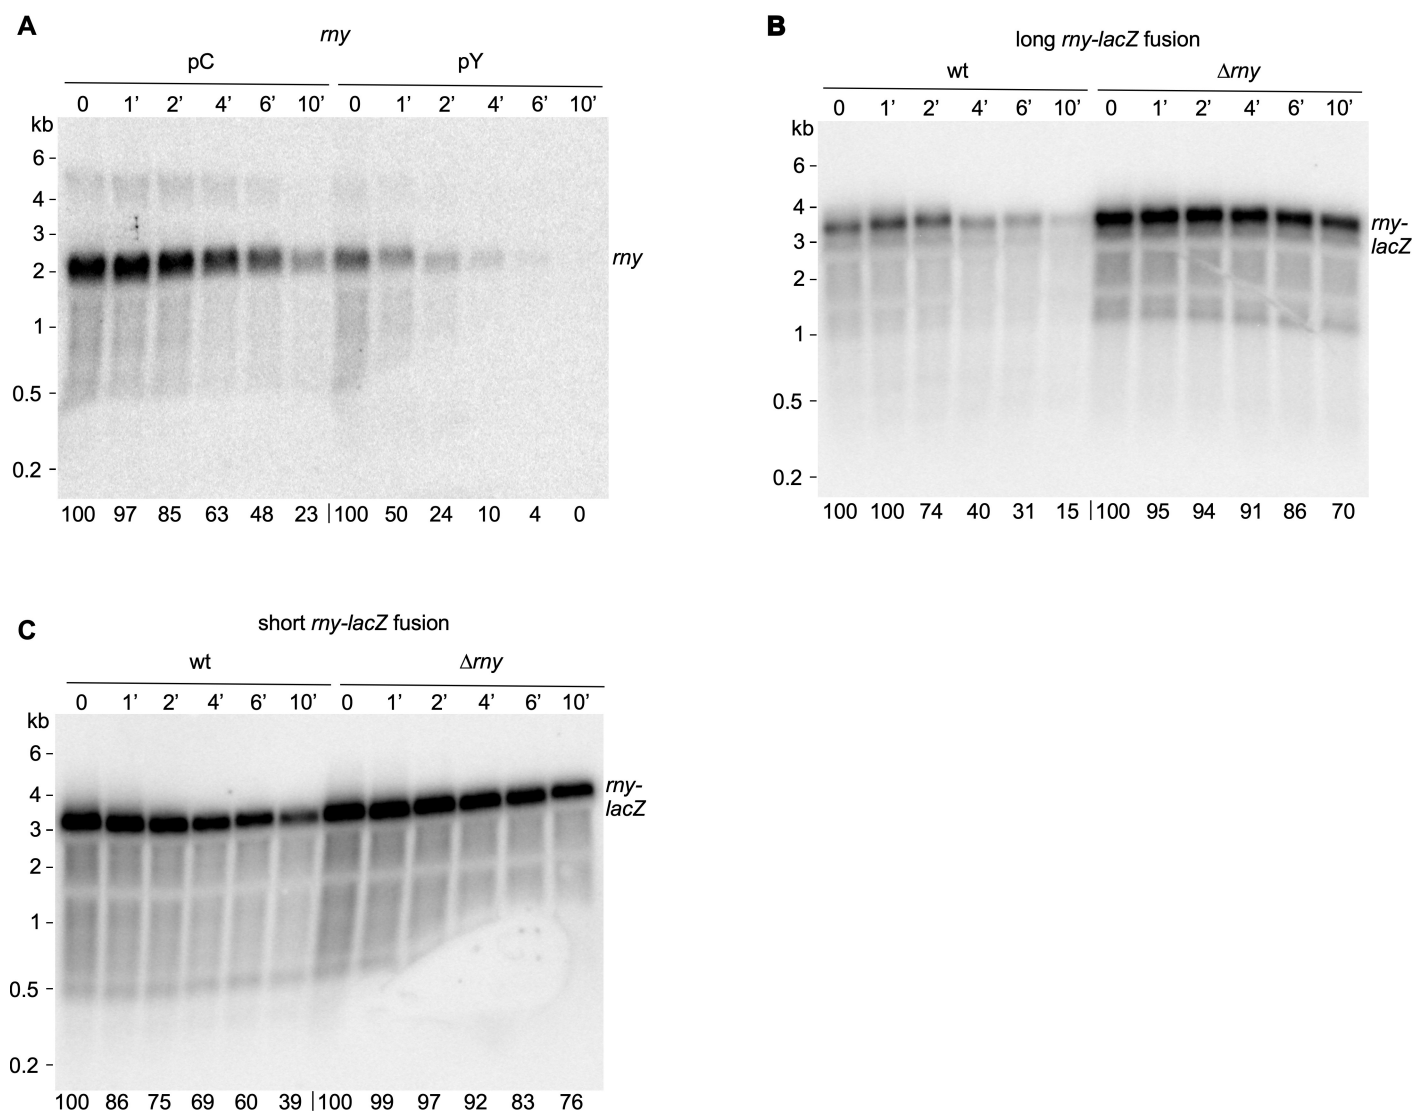

Supplement: s1 [file s1]
